# Supplementary material
Source: Research Square preprint supplement (doi:10.21203/rs.3.rs-9464868/v1)
Supplement: Supplementary file 1 [file b72d250c2f395742dff09b7c.docx]

Supplementary information:

Analysis of the impact and ambition of the new NDCs for 2035: Paris climate goal is further out of reach

# Supplementary Text 1: IMAGE Modelling framework

The main tool of our study is the **IMAGE** modelling framework and complemented with results from other studies when necessary (Stehfest et al., 2014). The IMAGE model is an integrated assessment model with 26 regions as well, consisting of a set of linked and integrated models, which, together, describe important elements in the long-term dynamics of global environmental change (Hof et al., 2022; Stehfest et al., 2014; Van Vuuren et al., 2021; van Vuuren et al., 2017a; van Vuuren et al., 2018). The model includes detailed descriptions of the energy system and food consumption and production, using TIMER and agricultural trade and production models. The land-cover submodels simulate the change in land-use and land cover, at 0.5×0.5° (driven by demand for food, timber and bioenergy, and changes in climate), and the land-use related emissions. In terms of land-based mitigation options, IMAGE accounts for three general types of options: bio-energy production, REDD (avoided deforestation) and reforestation of degraded forests. Bio-energy demand is determined by TIMER based on bio-energy yield, the carbon price, dynamics in the energy system, and land availability, following a food-first principle.

**TIMER**, the energy model of IMAGE, describes demand and supply of key energy carriers (van Vuuren, van Ruijven et al. 2006). The model addresses key issues such as transitions to sustainable and modern energy systems, improving energy access, future energy demand projections, exploring the role of the energy conversion sector and various energy technologies in promoting sustainability. Market shares of technologies are determined using perceived costs of different options with a multinomial logit allocation. It thereby assigns the largest market share to the cheapest energy technologies, while technologies that have higher costs get lower shares, considering heterogeneous local characteristics where relevant. The discount rates, which reflect the regional investment risks, play a key role in determining the annualized capital costs of a given technology. TIMER also calculates greenhouse gas emissions associated with energy consumption and energy conversion processes, providing insights into strategies for mitigating climate impacts.

The **IMAGE-Land Management** model simulates agricultural land use, natural land cover, forestry, and livestock systems on a high-resolution grid with a spatial detail of 5 arc minutes. This granularity enables precise analysis of land-use dynamics and their interactions with environmental and socio-economic factors. IMAGE-Land Management is also used to allocate land required for bioenergy production after the demand is determined in TIMER (Doelman, Stehfest et al. 2018).

The **FAIR** model of IMAGE calculates the impact of climate mitigation policy using carbon prices and marginal abatement cost curves (MACs) representing costs of mitigation actions to determine a cost-optimal emission pathway (den Elzen et al., 2014; Hof et al., 2017). It captures the time- and pathway dependent dynamics of the underlying TIMER model by scaling the marginal abatement costs (MAC) curves based on the reduction effort from the previous years. The marginal abatement curves costs curves in FAIR are based on (i) the IMAGE energy model TIMER for energy-related CO2 emissions (Stehfest et al., 2014) and (ii) MACs for non-CO2 GHG emissions as described in Harmsen et al. (Harmsen et al., 2019). Some recent updates were made based on Harmsen et al. (Harmsen et al., 2023) and EPA (EPA, 2013); see Hof et al. (Hof et al., 2022) for more detail. The non-CO2 MAC curves are made consistent with the IMAGE scenarios. The MAC curves for energy-related CO2 emissions were constructed to account for past efforts by imposing a wide range of carbon price pathways in the TIMER model and recording the induced reduction in CO2 emissions (van Vuuren et al., 2007).


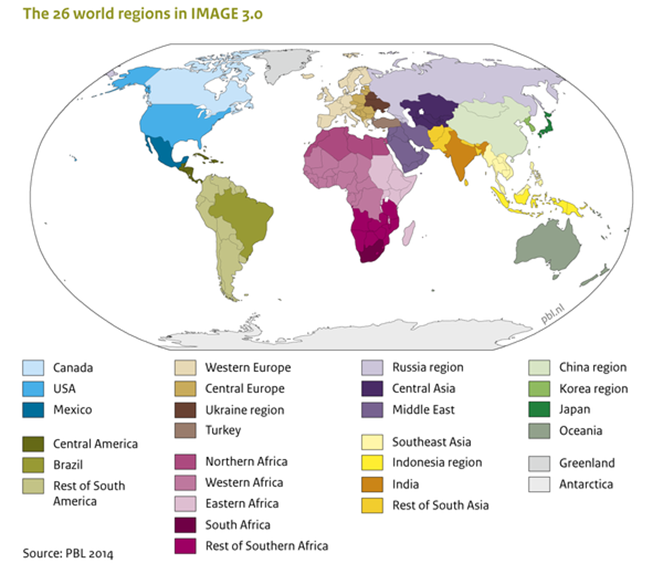


Figure 1: The 26 world regions of IMAGE

# Supplementary Text 2: Overview of the scenarios

To meet the objective of the research, we will look at the following scenarios.

*1) Current policies scenario of IMAGE.* The impact of the most effective current policies on greenhouse gas emissions up to 2030 has been projected for the median estimates of the IMAGE model (Dafnomilis et al., 2025; Nascimento et al., 2024). The basis of the IMAGE calculations is the SSP2 baseline (no climate policy), as implemented in the IMAGE model (Roelfsema et al., 2022; 2020; Van Vuuren et al., 2017b). Current climate and energy policies until 2035 or beyond in all individual G20 countries, as identified in the ENGAGE and ELEVATE projects and reported at Dafnomilis et al. (2025; 2025) were added to that baseline. In the case of a country not yet having adopted climate policies to 2035, the method used to extend projections followed two key assumptions: a) the policy remains in place post-2030, for example, a carbon price established to meet targets by 2030 is maintained at the same level until 2035; and b) specific targets, such as a renewable energy mix by 2030, are treated as a minimum threshold in the IMAGE model. For countries that are part of a larger IMAGE region (Australia, Republic of Korea, Russian Federation, and the EU27), emissions projections were downscaled using the country’s share in the region’s 2023 emissions as a constant scaling factor.

The LULUCF CO2 emissions and their removals were calculated using the global GLOBIOM and G4M land-use models (Havlík et al., 2014). The starting point for the climate policy LULUCF calculations is the latest SSP2 reference scenario as implemented in the GLOBIOM and G4M models (Fricko et al., 2017), as reported at Dafnomilis et al. (2025). Current LULUCF policies for major emitting countries, were added to that baseline. The effect of individual policies is calculated by GLOBIOM and G4M using a country-specific carbon price, which is set at a level to ensure that the policies are successfully implemented by the target date (Dafnomilis et al., 2025). The impact of climate change and natural disturbances is not accounted for in the land use projections.

2-3) *Unconditional and conditional updated NDC scenario*: The NDC scenario assumes full implementation of the NDC targets, using the new NDCs if available (as of beginning of January 2026). For countries with no new NDC submission, emissions are assumed to follow the current policies scenario a conservative choice since for most countries without a new NDC, the emissions still need to peak, and their projected emissions are above the 2030 NDC levels. Several countries have distinguished unconditional and conditional targets[[1]](#footnote-2) in their NDCs, which is why we have introduced both an unconditional and conditional NDC scenario. For countries whose NDCs include unconditional targets only, emission levels are assumed to be the same in both scenarios. For countries having only conditional NDC targets, unconditional NDC emission levels were assumed to equal those from the current policies scenario.

4-5) *Unconditional and conditional previous NDC scenario*: The same scenarios as the updated NDC scenarios as described above, but here assuming a full implementation of the earlier NDC submissions, as of October 2023.

# Supplementary Text 3: Projected global greenhouse gas emission levels by 2030 and 2035

Table S.1: Greenhouse gas emissions (including LULUCF) in G20 economies, selected non-G20 countries and global emission levels, projected for **2030** for the IMAGE current policies scenario, the unconditional NDC scenario and the conditional NDC scenario.

| GHG emissions (MtCO2eq) |  |  | Current policies scenario | | | Unconditional NDC  scenario | | | Conditional NDC  scenario | | |
| --- | --- | --- | --- | --- | --- | --- | --- | --- | --- | --- | --- |
|  | **2015** | **2021** | **2030** | **min** | **max** | **2030** | **min** | **max** | **2030** | **min** | **max** |
| Argentina | 386 | 401 | 432 | 432 | 432 | 360 | 360 | 360 |  |  |  |
| Australia | 535 | 441 | 332 | 250 | 332 | 351 | 351 | 351 |  |  |  |
| Brazil | 1573 | 2121 | 1925 | 1918 | 1943 | 1204 | 1204 | 1204 |  |  |  |
| Canada | 796 | 718 | 619 | 629 | 637 | 487 | 487 | 487 |  |  |  |
| China | 11593 | 13184 | 12229 | 12229 | 13517 | 13232 | 13232 | 13232 |  |  |  |
| EU27 | 3503 | 3227 | 2275 | 2118 | 2301 | 2093 | 2093 | 2093 |  |  |  |
| UK | 513 | 425 | 363 | 338 | 389 | 263 | 263 | 263 |  |  |  |
| India | 2702 | 2837 | 3965 | 3790 | 4016 | 3981 | 3981 | 3981 | 3981 | 3981 | 3981 |
| Indonesia | 2569 | 1306 | 1528 | 1528 | 1931 | 1984 | 1984 | 1984 | 1654 | 1654 | 1654 |
| Japan | 1266 | 1112 | 796 | 796 | 895 | 766 | 766 | 766 |  |  |  |
| Mexico | 502 | 563 | 621 | 621 | 754 | 719 | 719 | 719 | 616 | 616 | 616 |
| South Korea | 659 | 631 | 465 | 465 | 540 | 441 | 441 | 441 |  |  |  |
| Russia | 781 | 1148 | 638 | 638 | 1087 | 1713 | 1713 | 1713 |  |  |  |
| Saudi Arabia | 680 | 681 | 828 | 825 | 833 | 1046 | 863 | 1229 |  |  |  |
| South Africa | 519 | 479 | 402 | 402 | 468 | 392 | 356 | 427 |  |  |  |
| Türkiye | 410 | 527 | 546 | 473 | 547 | 701 | 701 | 701 |  |  |  |
| US | 5958 | 5458 | 5393 | 5124 | 5393 |  |  |  |  |  |  |
| G20 economies | 34944 | 35258 | 33357 | 32576 | 36016 | 29731 | 29512 | 29950 | 29299 | 29080 | 29518 |
| Non-G20 countries | 1898 | 19914 | 22117 | 21934 | 22300 | 25974 | 26091 | 25858 | 24454 | 24569 | 24339 |
| International bunker emissions | 1237 | 1057 | 1427 | 1427 | 1427 | 1427 | 1427 | 1427 | 1427 | 1427 | 1427 |
| Remaining LULUCF emissions | -778 | -880 | -841 | -841 | -841 | -841 | -841 | -841 | -841 | -841 | -841 |
| Global, excluding overachievement | 54385 | 55755 | 56021 | 55057 | 58864 | 59423 | 59178 | 59668 | 56291 | 56097 | 56486 |
| Additional reduction due to overachievement of NDCs* |  |  |  |  |  | 6497 | 6342 | 6653 | 4926 | 4823 | 5029 |
| Global emissions, including overachievement of NDCs * | 54385 | 55349 | 56604 | 56060 | 55096 | 53457 | 53367 | 53547 | 51932 | 51841 | 52023 |

Table S.2: Greenhouse gas emissions (including LULUCF) in G20 economies, selected non-G20 countries and global emission levels, projected for **2035** for the IMAGE current policies scenario, the unconditional NDC scenario and the conditional NDC scenario.

| GHG emissions (MtCO2eq) |  |  | Current policies scenario | | | Unconditional NDC  scenario | | | Conditional NDC  scenario | | |
| --- | --- | --- | --- | --- | --- | --- | --- | --- | --- | --- | --- |
|  | **2015** | **2021** | **2035** | **min** | **max** | **2030** | **min** | **max** | **2030** | **min** | **max** |
| Argentina | 386 | 401 | 462 | 462 | 462 | 360 | 360 | 360 |  |  |  |
| Australia | 535 | 441 | 323 | 191 | 323 | 209 | 185 | 234 |  |  |  |
| Brazil | 1573 | 2121 | 1781 | 1717 | 1829 | 952 | 852 | 1053 |  |  |  |
| Canada | 796 | 718 | 498 | 508 | 611 | 446 | 427 | 465 |  |  |  |
| China | 11593 | 13184 | 11087 | 10331 | 12174 | 12808 | 12598 | 13018 |  |  |  |
| EU27 | 3503 | 3227 | 1441 | 1441 | 2011 | 1425 | 1279 | 1570 |  |  |  |
| UK | 513 | 425 | 335 | 286 | 384 | 156 | 156 | 156 |  |  |  |
| India | 2702 | 2837 | 4286 | 3831 | 4479 | 5001 | 5001 | 5001 | 5001 | 5001 | 5001 |
| Indonesia | 2569 | 1306 | 1475 | 1475 | 1985 | 1791 | 1791 | 1791 | 1377 | 1261 | 1493 |
| Japan | 1266 | 1112 | 603 | 603 | 820 | 575 | 575 | 575 |  |  |  |
| Mexico | 502 | 563 | 593 | 593 | 829 | 387 | 367 | 407 | 350 | 335 | 366 |
| South Korea | 659 | 631 | 299 | 299 | 515 | 321 | 291 | 350 |  |  |  |
| Russia | 781 | 1148 | 761 | 723 | 1197 | 1615 | 1590 | 1639 |  |  |  |
| Saudi Arabia | 680 | 681 | 875 | 872 | 880 | 864 | 737 | 991 |  |  |  |
| South Africa | 519 | 479 | 401 | 401 | 438 | 360 | 329 | 391 |  |  |  |
| Türkiye | 410 | 527 | 567 | 467 | 581 | 647 | 647 | 647 |  |  |  |
| US | 5958 | 5458 | 5041 | 4772 | 5041 |  |  |  |  |  |  |
| G20 economies | 34944 | 35258 | 30827 | 28972 | 34559 | 27917 | 27185 | 28648 | 22464 | 21621 | 23307 |
| Non-G20 countries | 1898 | 19914 | 23085 | 22713 | 23392 | 25974 | 26091 | 25858 | 24454 | 24569 | 24339 |
| International bunker emissions | 1237 | 1057 | 1584 | 1584 | 1584 | 1584 | 1584 | 1584 | 1584 | 1584 | 1584 |
| Remaining LULUCF emissions | -778 | -880 | -827 | -827 | -827 | -827 | -827 | -827 | -827 | -827 | -827 |
| Global, excluding overachievement | 54385 | 55755 | 56021 | 55057 | 58864 | 59423 | 59178 | 59668 | 56291 | 56097 | 56486 |
| Additional reduction due to overachievement of NDCs* |  |  |  |  |  | 6497 | 6342 | 6653 | 4926 | 4823 | 5029 |
| Global emissions, including overachievement of NDCs * | 54385 | 55349 | 54669 | 52443 | 58708 | 51244 | 50884 | 51604 | 49693 | 49361 | 50024 |

# Supplementary Text 4: Projected per capita greenhouse gas emission levels by 2030 and 2035 and peaking dates


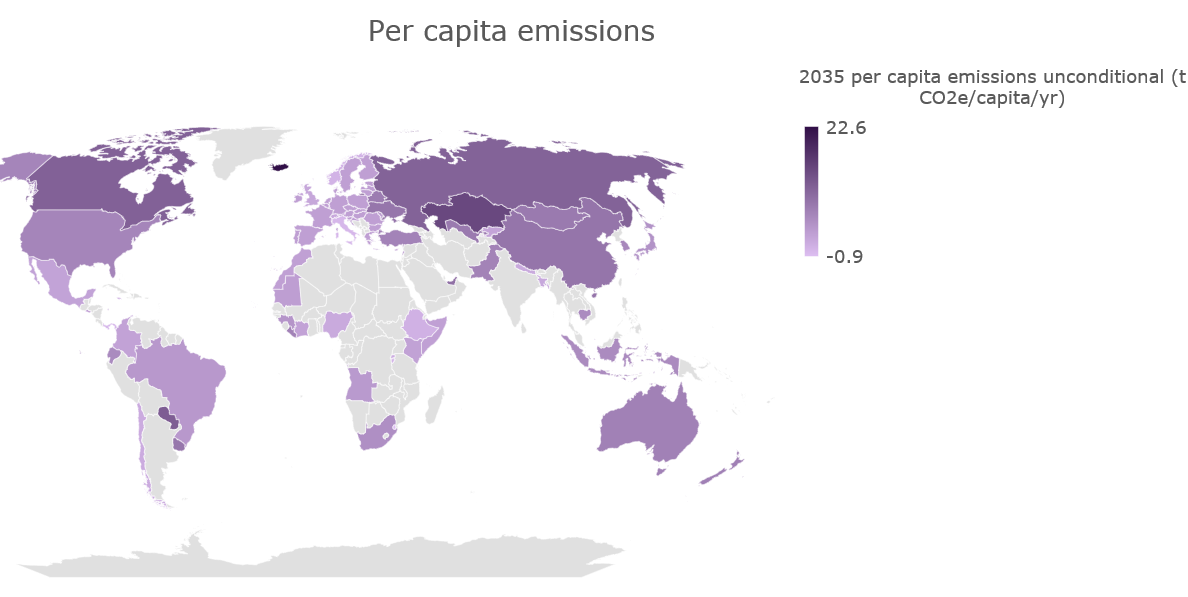


Figure 6. Per capita emissions by 2035 implied by the NDCs for all countries analysed in this study


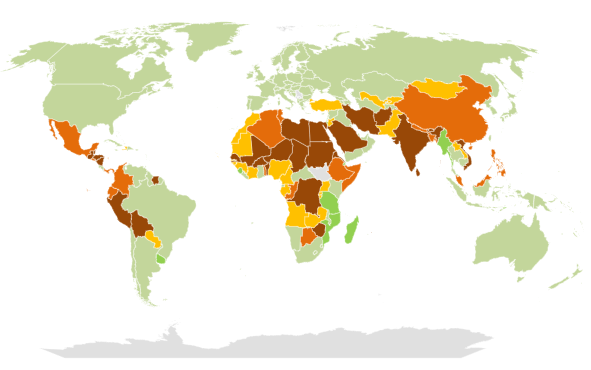

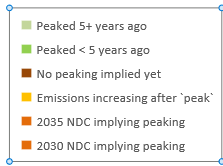


Figure 7. Time of peaking of emissions for all countries analysed in this study.

# Supplementary Text 5: The contribution of the LULUCF emissions in the new NDCs.

LULUCF accounting method chosen for quantification

Table S.2 provides an overview of how the NDC targets have been quantified for the G20 countries and lists them by the accounting method which we have assumed. Most of the analysed countries report emission target levels that include emissions and removals from activities related to the LULUCF sector. Although there are uncertainties concerning which accounting approaches and methodologies countries will apply to account for LULUCF related emissions and removals towards their NDC reduction targets, we assume that a majority of countries will apply the net-net accounting approach (den Elzen et al., 2016) (den Elzen et al., 2022).3F[[2]](#footnote-3) When applying this approach, all emissions and removals from the LULUCF sector are accounted for when calculating this base year estimate and target year estimate. In other words, the sector is treated like any other sector that is included in the NDC target.

A few countries have established accounting approaches for each LULUCF sub-sector and documented these in national documents and regulations. Two such examples are Canada[[3]](#footnote-4) and the EU27[[4]](#footnote-5). For the EU27 we apply a simplistic approach and assume that the EU27 will account for all LULUCF sub-sectors using the net-net accounting approach as this is the case for the majority of the sub-sectors. For Canada, LULUCF emissions are excluded for the base year when calculating the NDC target in terms of MtCO2eq in 2030. However, the LULUCF sector does based on the selected accounting approach provide a set of carbon credits or debits when assessing if Canada has reached their NDC target. This calculation of the amount of credits varies between the sub-sectors but overall compares the LULUCF emissions in 2005 to the net emission in 2030 (i.e. a net-net estimate). For this assessment we make a simple assumption assume that Canada will be using the net-net accounting for all sub-sectors.

For countries that explicitly mentioned in their NDCs that emissions and removals from the LULUCF sector are excluded (Saudi Arabia), the LULUCF sector is excluded from the calculation of the NDC target emission levels and current policies scenario projections.

An example of a country that applies a different approach is that of Republic of Korea that explicitly state in their NDCs that emissions and removals from the LULUCF sector are excluded when calculating their emissions for the base year (2017), but that emissions and removals from the LULUCF are to be accounted for when assessing their target of total GHG emission reduction by 2030. As the LULUCF sector was a sink of -44.5 MtonCO2eq in 2017 (UNFCCC, 2022), this selective accounting approach facilitates Korea’s efforts to reduce their domestic emission.

Further discussions concerning how individual countries consider the LULUCF sector within their previous NDCs can be found in Forsell et al. (2024). Russia, India, and US are all assumed to treat the LULUCF sector in the same way for this assessment as no additional specifications has yet been provided by these countries.

Table S.3. Overview of NDC configuration for the G20 countries

| Country | Target type | LULUCF sector is included in the NDC | Approach for NDC quantification by authors | | |
| --- | --- | --- | --- | --- | --- |
| Reference emissions include LULUCF | LULUCF treated separately | LULUCF accounting method applied |
| Argentina | Baseline specified | Yes | Yes | No | Net-Net |
| Australia | Base year | Yes | Yes | No | Net-Net |
| Brazil | Base year | Yes | Yes | No | Net-Net |
| Canada | Base year | Yes | No | Yes | Net-Net |
| China | Intensity and non-GHG | Yes | Yes | No | Net-Net |
| EU27 | Base year | Yes | Yes | No | Net-Net |
| India | Intensity and non-GHG | Yes | Yes | No | Net-Net |
| Indonesia | Baseline specified | Yes | Yes | No | Net-Net |
| Japan | Base year | Yes | Yes | No | Gross-Net |
| Mexico | Baseline specified | Yes | Yes | No | Net-Net |
| Republic of Korea | Baseline specified | Yes | Yes | No | Gross-Net |
| Russian Federation | Base year | Yes | Yes | No | Net-Net |
| South Africa | Trajectory | Yes | Yes | No | Net-Net |
| Turkey | Baseline specified | Yes | Yes | No | Net-Net |
| USA | Base year | Yes | Yes | No | Net-Net |
| Saudi Arabia | Trajectory | No | No | No | None |

# Supplementary Text 6: Tables Impact of ambition

Table S.4: Implied NDC emissions trajectories compared to net-zero benchmarks for 2035 in G20 members whose net emissions have peaked.

| Country | Peak year | Net-zero year | Years from peak to net zero | Average annual  rate of change  2023–2030 to  achieve NDC | Average annual  rate of change  2031–2035 to  achieve new NDC | Average  rate of change  2035 – net-zero  year to achieve  net-zero target | Decarbonization rate post 2030,  assuming NDC is achieved (i) | 2035 unconditional NDC target (relative to 2015) (average) | 2035 emissions in linear pathways to net zero (relative to 2015) |
| --- | --- | --- | --- | --- | --- | --- | --- | --- | --- |
| Argentina | 2007 | 2050 | 43 | 1.3% |  |  |  | No new NDC | -30% |
| Australia | 2006 | 2050 | 44 | 2.9% | 8.1% | 4.0% | Slower | -61% | -51% |
| Brazil | 2004 | 2050 | 46 | 8.5% | 4.2% | 5.3% | Faster | -40% | -43% |
| Canada | 2004 | 2050 | 46 | 5.6% | 0.5% | 6.5% | Faster | -41% | -55% |
| EU | <1990 | 2050 | >=60 | 6.0% | 6.4% | 4.5% | Slower | -57% to -61% | -55% |
| Japan | 2013 | 2050 | 37 | 5.0% | 5.1% | 5.0% | Slower | -55% | -55% |
| Russian Fed. | 1990 | 2060 | 70 | -3.7% | 1.3% | 3.7% | Faster | 105% | 83% |
| South Africa | 2008 | 2050 | N/A | 2.5% | 2.1% | 4.6% | Faster | -43% to 40% | -40% |
| UK | 1991 | 2050 | 59 | 6.9% | 8.2% | 3.9% | Slower | -70% | -62% |
| United States | 2004 | No target |  |  |  |  |  | No new NDC |  |

Note: (i) Faster: needs to accelerate decarbonisation; Slower: no need to accelerate.

Table S.5: Implied NDC emissions trajectories compared to net-zero for 2035 in G20 members whose net emissions have not yet peaked.

| Country | Stated or implied peak year | Net-zero year | Maximum possible years from peak to net zero | Average annual  rate of change  2023–2030 to  achieve NDC | Average annual  rate of change  2031–2035 to  achieve new NDC | Average  rate of change  2035 – net-zero  year to achieve  net-zero target | Decarbonization rate post 2030,  assuming NDC is achieved (i) | 2035 NDC target (relative to 2019) (mean) | 2035 emissions in modelled pathways to net zero (relative to 2019) |
| --- | --- | --- | --- | --- | --- | --- | --- | --- | --- |
| China | <2030* | 2060 | 35 | 0.0% | 0.8% | 3.0% | Faster | 10% | -5% to -1% |
| India | >2030 | 2070 | N.A. | -3.2% |  |  |  | No NDC |  |
| Indonesia | 2030 | 2060 | 30 | -3.8% | 2.0% | 3.6% | Faster | -30% | -36% |
| Mexico | 2026 | 2050 | 24 | -2.4% | 9.3% | 1.9% | Faster | -24% | 7% to 17% |
| Saudi Arabia | >2030 | 2060 | N.A. | -2.4% |  |  |  | No target | 6% |
| South-Korea | <=2030 | 2050 | 32 | 4.8% | 5.5% | 4.2% | Slower | -52% | -50% to -48% |
| Türkiye | 2038 | 2053 | 15 | -2.8% | 1.6% | 5.1% | Faster | 57% | 34% |

Note: (i) Faster: needs to accelerate decarbonisation; Slower: no need to accelerate. * In our calculations 2025.

Table S.6: Implied NDC emissions trajectories compared to least costs 1.5°C and 2°C scenarios for 2035 in G20 members.

| Country | 2035 NDC target (relative to 2015) (average) | 2035 emissions in 1.5°C-derived benchmarks (C1)  (relative to 2015) | Alignment with 1.5°C-derived benchmarks | 2035 emissions in 2°C-derived benchmarks (C3)  (relative to 2015) | Alignment with 2°C-derived benchmarks |
| --- | --- | --- | --- | --- | --- |
| Major emitting G20 countries |  | Hooijschuur et al.* |  | Hooijschuur et al.* |  |
| China | 10% | -63% [-58% to -35%] | Out of range | -39% [-55% to -23%] | Out of range |
| EU | -57% to -61% | -67% [-54% to -79%] | Within the range | -50% [-32% to -64%] | More ambitious |
| India | No new NDC | -29% [-38% to -8%] | Out of range | +6% [-28% to 46%] | Out of range |
| Japan | -55% | -73% [-62% to -82%] | Out of range | -54% [-34% to -69%] | Within the range |
| United States | No new NDC | -71% [-57% to -82%] |  | -49% [-30% to -65%] |  |
| Other G20 countries |  | 1.5°C national pathway explorer** |  | IMAGE-POLES range 2°C- scenarios*** |  |
| Argentina | No new NDC | -51% [-48% to -62%] |  |  |  |
| Australia | -61% | -67% [-60% to -71%] | Upper range | -51% | More ambitious |
| Brazil | -40% | -70% [-58% to -114%] | Out of range | -18% – -86% | Within the range |
| Canada | -41% | -60% [-64% to -74%] | Out of range | -33% – -47% | Within the range |
| Indonesia | -30% | -52% [-88% to -96%] | Out of range | 1% – -55% | Within the range |
| Mexico | -24% | -57% [-79% to -82%] | Out of range | -23% – -32% | Within the range |
| South Korea | -52% | -69% [-68% to -83%] | Out of range | -44% – -48% | Within the range |
| Russian Fed. | 105% | N.A. [-69% to -82%] | Out of range | -59% – 5% | Out of range |
| Saudi Arabia | No target | -63% [-69% to -46%] | Out of range | -63% |  |
| South Africa | -43% to -40% | -71% [-61% to -72%] | Out of range | -47% – -57% | Out of range |
| Türkiye | 57% | -24% [-59% to -47%] | Out of range | 16% – 2% | Out of range |
| United Kingdom | -70% | -75% [-66% to -76%] | Within the range | -76% | More ambitious |

Note: * Hooijschuur et al. (2025); ** Climate Analytics 1.5°C national pathway explorer; *** If available, for IMAGE there are no estimates for the countries: Australia, Saudi Arabia, United Kingdom

To compare the new NDCs with 'fair shares’, we determined the number of equity approaches in which the median reduction target falls below the reduction target of the new NDCs, see Table S.7.

Table S.7: Implied NDC emissions trajectories compared to 1.5°C-derived benchmarks for 2035 in G20 members whose net emissions have peaked.

| Country | 2035 uncondi-tional NDC target (relative to 2015) | 2035 emissions in 1.5°C-equity benchmarks  (relative to 2015) | | | Alignment with 1.5°C-equity* | 2035 emissions in 2°C-equity benchmarks  (relative to 2015) | | | Alignment with 2°C-equity |
| --- | --- | --- | --- | --- | --- | --- | --- | --- | --- |
|  |  | Capa-bility | Equality | Res-ponsibility |  | Capa-bility | Equality | Res-ponsibility |  |
| Argentina | No new NDC | -63% | -68% | -141% |  | -40% | -47% | -124% |  |
| Australia | -61% | -90% | -75% | -244% | 0 | -64% | -59% | -238% | 1 |
| Brazil | -40% | -56% | -68% | -169% | 0 | -34% | -47% | -154% | 1 |
| Canada | -41% | -88% | -74% | -227% | 0 | -62% | -57% | -220% | 0 |
| China | 10% | -58% | -59% | -73% | 0 | -25% | -31% | -54% | 0 |
| EU | -57% to -61% | -87% | -63% | -127% | 0 | -64% | -38% | -107% | 1 |
| India | No new NDC | -2% | -18% | 335% |  | 35% | 37% | 415% |  |
| Indonesia | -30% | -44% | -67% | -80% | 0 | -14% | -45% | -59% | 1 |
| Japan | -55% | -88% | -67% | -138% | 0 | -68% | -45% | -122% | 1 |
| Mexico | -24% | -63% | -57% | -64% | 0 | -39% | -28% | -36% | 0 |
| South Korea | -52% | -87% | -68% | -149% | 0 | -58% | -47% | -137% | 1 |
| Russian Federation | 105% | -73% | -69% | -188% | 0 | -49% | -49% | -179% | 0 |
| Saudi Arabia | No target | -87% | -73% | -186% |  | -49% | -55% | -178% |  |
| South Africa | -43% to -40% | -54% | -64% | -137% | 0 | -34% | -41% | -117% | 0 |
| Türkiye | 57% | -75% | -51% | -19% | 0 | -38% | -19% | 12% | 0 |
| UK | -70% | -88% | -63% | -137% | 1 | -67% | -39% | -114% | 2 |
| US | No new NDC | -95% | -71% | -226% |  | -66% | -52% | -217% |  |

* Number of equity approaches where the median reduction target falls below the reduction target of the new NDC target.

# References

Dafnomilis I, Scheewel J-L, den Elzen MGJ, Araujo Gutiérrez Z, Hooijschuur E, Kuramochi T, . . . Fekete H (2025) Progress of major emitters towards climate targets: 2025 Update. NewClimate Institute (Cologne, Germany), PBL (The Hague, the Netherlands), IIASA (Austria), <https://newclimate.org/resources/publications/progress-of-major-emitters-towardsclimate-targets-2025-update> . .

Dekker M, Würschinger C, Van Heerden R, Hooijschuur E, Tagomori IS, van Vuuren DP (2025) Fair emissions allocations under various global conditions (0.4.2) [Data set]. Zenodo, <https://doi.org/10.5281/zenodo.14505804> <https://doi.org/10.1038/s43247-023-01184-8>.

den Elzen M, Admiraal A, Roelfsema M, van Soest H, Hof AF, Forsell N (2016) Contribution of the G20 economies to the global impact of the Paris agreement climate proposals. Climatic Change 137:655–665 <https://doi.org/10.1007/s10584-016-1700-7>.

den Elzen MGJ, Dafnomilis I, Forsell N, Fragkos P, Fragkiadakis K, Höhne N, . . . Sperling F (2022) Updated nationally determined contributions collectively raise ambition levels but need strengthening further to keep Paris goals within reach. Mitigation and Adaptation Strategies for Global Change 27:33 <https://doi.org/10.1007/s11027-022-10008-7>.

den Elzen MGJ, Hof A, van den Berg M, Roelfsema M (2014) Climate policy. in Stehfest E, Van Vuuren D, Kram T, Bouwman L (eds.) Integrated Assessment of Global Environmental Change with IMAGE 3.0 - Model description and policy applications. PBL, The Hague, pp. 71–152.

EPA (2013) Global Mitigation of Non-CO2 Greenhouse Gases: 2010-2030. United States Environmental Protection Agency (EPA), Washington DC, report EPA-430-R-13-011, <http://www.epa.gov/climatechange/Downloads/EPAactivities/MAC_Report_2013.pdf>.

Forsell N, Araujo Gutiérrez Z, Chen M (2024) Historical and future development of greenhouse gas emission and removal from the land use sector from the view of countries. FORMATH 23 <https://doi.org/10.15684/formath.24.001>.

Harmsen JHM, van Vuuren DP, Nayak DR, Hof AF, Höglund-Isaksson L, Lucas PL, . . . Stehfest E (2019) Long-term marginal abatement cost curves of non-CO2 greenhouse gases. Environmental Science & Policy 99:136–149 <https://doi.org/10.1016/j.envsci.2019.05.013>.

Harmsen M, Tabak C, Höglund-Isaksson L, Humpenöder F, Purohit P, van Vuuren D (2023) Uncertainty in non-CO2 greenhouse gas mitigation contributes to ambiguity in global climate policy feasibility. Nature Communications 14:2949 <https://doi.org/10.1038/s41467-023-38577-4>.

Havlík P, Valin H, Herrero M, Obersteiner M, Schmid E, Rufino MC, . . . Conant RT (2014) Climate change mitigation through livestock system transitions. Proceedings of the National Academy of Sciences 111:3709–3714 <https://doi.org/10.1073/pnas.1308044111>.

Hof AF, den Elzen MGJ, Admiraal A, Roelfsema M, Gernaat DEHJ, van Vuuren DP (2017) Global and regional abatement costs of Nationally Determined Contributions (NDCs) and of enhanced action to levels well below 2 °C and 1.5 °C. Environmental Science & Policy 71:30–40 <http://dx.doi.org/10.1016/j.envsci.2017.02.008>.

Hof AF, Esmeijer K, de Boer HS, Daioglou V, Doelman JC, den Elzen MGJ, . . . van Vuuren DP (2022) Regional energy diversity and sovereignty in different 2 °C and 1.5 °C pathways. Energy 239:122197 <https://doi.org/10.1016/j.energy.2021.122197>.

Hooijschuur E, den Elzen MGJ, Dafnomilis I, van Vuuren DP (2025) Analysis of cost-effective reduction pathways for major emitting countries to achieve the Paris Agreement climate goal. Global Environmental Change Advances 4:100014 <https://doi.org/10.1016/j.gecadv.2025.100014>.

Nascimento L, den Elzen M, Kuramochi T, Woollands S, Dafnomilis I, Moisio M, . . . Araujo Gutierrez Z (2024) Comparing the Sequence of Climate Change Mitigation Targets and Policies in Major Emitting Economies. Journal of Comparative Policy Analysis: Research and Practice 26:233–250 <https://doi.org/10.1080/13876988.2023.2255151>.

Roelfsema M, van Soest HL, den Elzen M, de Coninck H, Kuramochi T, Harmsen M, . . . van Vuuren DP (2022) Developing scenarios in the context of the Paris Agreement and application in the integrated assessment model IMAGE: a framework for bridging the policy-modelling divide. Environmental Science and Policy 135:104–116 <https://doi.org/10.1016/j.envsci.2022.05.001>.

Roelfsema M, van Soest HL, Harmsen M, van Vuuren DP, Bertram C, den Elzen M, . . . Vishwanathan SS (2020) Taking stock of national climate policies to evaluate implementation of the Paris Agreement. Nature Communications 11:2096 <https://doi.org/10.1038/s41467-020-15414-6>.

Stehfest E, Van Vuuren DP, Kram T, Bouwman L (2014) Integrated assessment of global environmental change with IMAGE 3.0. Model description and policy applications. PBL Netherlands Environmental Assessment Agency., The Hague, the Netherlands, <https://www.pbl.nl/en/publications/integrated-assessment-of-global-environmental-change-with-IMAGE-3.0>.

UNFCCC (2022) Submitted Biennial Update Reports (BURs) from Non-Annex I Parties, <https://unfccc.int/BURs> (Accessed: 30 September 2022).

UNFCCC (2026) NDC registry, <https://unfccc.int/NDCREG> (Accessed: 5 January 2026).

Van Vuuren D, Stehfest E, Gernaat D, de Boer H-S, Daioglou V, Doelman J, . . . van den Berg M (2021) The 2021 SSP scenarios of the IMAGE 3.2 model, . <https://www.pbl.nl/en/publications/the-2021-ssp-scenarios-of-the-image-32-model>.

van Vuuren DP, den Elzen MGJ, Eickhout B, Lucas PL, Strengers BJ, Ruijven B, . . . van Houdt R (2007) Stabilizing greenhouse gas concentrations at low levels: an assessment of reduction strategies and costs. Climatic Change 81:119–159 <https://doi.org/10.1007/s10584-006-9172-9>.

van Vuuren DP, Stehfest E, Gernaat D, Doelman J, van den Berg M, Harmsen M, . . . Tabeau A (2017a) Energy, land-use and greenhouse gas emissions trajectories under a green growth paradigm. Global Environmental Change 42:237–250 <http://dx.doi.org/10.1016/j.enpol.2015.11.030>.

Van Vuuren DP, Stehfest E, Gernaat DE, Doelman JC, Van den Berg M, Harmsen M, . . . Edelenbosch OY (2017b) Energy, land-use and greenhouse gas emissions trajectories under a green growth paradigm. Global Environmental Change 42:237–250 <http://dx.doi.org/10.1016/j.enpol.2015.11.030>.

van Vuuren DP, Stehfest E, Gernaat DEHJ, van den Berg M, Bijl DL, de Boer HS, . . . van Sluisveld MAE (2018) Alternative pathways to the 1.5 °C target reduce the need for negative emission technologies. Nature Climate Change 8:391–397 <https://doi.org/10.1038/s41558-018-0119-8>.

1. The unconditional target holds irrespective of actions of other countries, whereas for the latter, more ambitious, target, certain conditions regarding the actions of other countries (which mostly refer to international finance or international cooperation mechanisms) have to be met (den Elzen et al., 2016; UNFCCC, 2026). [↑](#footnote-ref-2)
2. In this approach, activities are accounted using the reported net emissions in each year of the accounting period minus the net emissions in the base year. In the situation where the net emissions have decreased, a country may issue credits (i.e. removal units, or RMUs) and if net emissions have increased, it must cancel units (i.e. take on debits). The net-net LULUCF accounting method implies that credits and debits from the LULUCF sector are treated in the same way as any other GHG inventory sector, where emissions are compared to those in the base year. [↑](#footnote-ref-3)
3. For further information about the accounting approaches that have been established for Canada we refer to 2018 Canada’s Greenhouse Gas and Air Pollutant Emissions Projections (<http://publications.gc.ca/collections/collection_2018/eccc/En1-78-2018-eng.pdf>) and Canada’s Fourth Biennial Report on Climate Change (<https://unfccc.int/documents/209928> ). [↑](#footnote-ref-4)
4. For further information about the accounting approaches have been established for EU27 we refer to the Revision of the Regulation on the inclusion of greenhouse gas emissions and removals from land use, land use change and forestry (<https://ec.europa.eu/info/sites/default/files/revision-regulation-ghg-land-use-forestry_with-annex_en.pdf>) [↑](#footnote-ref-5)
